# Supplementary material
Source: PubMed Central journal article supplement (PMC2951204)
Supplement: supp_M110.147850_jbc.M110.147850-1.pdf [file supp_M110.147850_jbc.M110.147850-1.pdf]

### Supplementary Table-1

| <b>Composition</b> | <b>Normal Diet</b> | <b>High Fat Diet<br/>(TD 06414)</b> |
|--------------------|--------------------|-------------------------------------|
| Protein            | 16.7%              | 23.5%                               |
| Carbohydrate       | 56%                | 27.3%                               |
| Fat                | 4.2%               | 34.3%                               |
| Energy             | 3.3 Kcal/g         | 5.1 Kcal/g                          |

Composition of normal diet and hight fat diet.

## Supplementary Table-2

|                                          |               |
|------------------------------------------|---------------|
| Interferon- $\gamma$                     | MIP-1b        |
| MIP-1a                                   | IL-6          |
| Keratinocyte chemoattractant (KC)        | IL-5          |
| Interferon inducible protein-10          | IL-3          |
| IL-7                                     | IL-4          |
| IL-9                                     | IL-12p70      |
| IL-10                                    | Eotaxin       |
| VEGF                                     | IL-12p40      |
| Monocyte induced by $\gamma$ -interferon | IL-15         |
| Monocyte chemoattractant protein-1       | IL-2          |
| M-CSF                                    | IL-13         |
| G-CSF                                    | IL-1 $\beta$  |
| Leukemia inhibitory factor cytokine      | IL-17         |
| GM-CSF                                   | RANTES        |
| Lipopolysaccharide induced CXC chemokine | IL-1 $\alpha$ |
| TNF- $\alpha$                            | MIP-2         |

List of cytokines measured using the luminex cytokine panel.

### Supplementary Table-3

|                                   |
|-----------------------------------|
| ER- $\alpha$                      |
| ER- $\beta$                       |
| PGC-1 $\alpha$                    |
| PGC-1 $\beta$                     |
| UCP-1                             |
| C/EBP- $\delta$                   |
| mCPT-1                            |
| PPAR- $\delta$                    |
| SHP                               |
| PRDM16                            |
| Dio2                              |
| FASN                              |
| CPT-1                             |
| LXR- $\alpha$                     |
| Apolipoprotein E                  |
| Glucose-6-phosphate dehydrogenase |

|                                      |
|--------------------------------------|
| Glycerol-3-phosphate acyltransferase |
| SREBP-1c                             |
| GAPDH                                |
| 18S                                  |
| Leptin receptor                      |
| Phospholipids transfer protein       |
| C/EBP- $\alpha$                      |
| STAT-1                               |
| GADD153                              |
| Glutathione peroxidase 3             |
| CIDEA                                |
| Lipoprotein lipase                   |
| Farnesoid X-receptor                 |
| Amyloid precursor protein            |
| PPAR- $\gamma$                       |
| PPAR- $\alpha$                       |

Taqman gene expression array list.

# Supplementary Figure-1

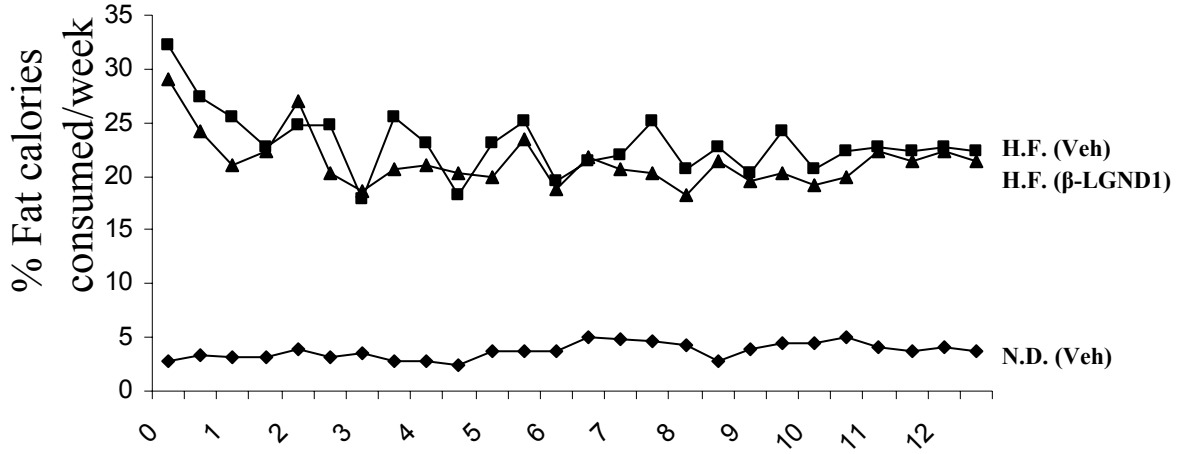

Percent fat calories was calculated for animals fed with normal diet (N.D. Veh) or with high fat diet (H.F. diet) and treated with vehicle (Veh) or  $\beta$ -ligand ( $\beta$ -LGND1) for 12 weeks.
